# Supplementary material for: Magnetic properties of RBzPy[Ni(α-tpdt)2] (R = H, Br, F): effects of cis–trans disorder
Source: Royal Society of Chemistry journal article supplement (doi:10.1039/b603443h), 2006-01-01
Supplement: b603443h.pdf [file b603443h.pdf]

## Supplementary material

For RBzPy[Ni( $\alpha$ -tpdt)<sub>2</sub>], (R=H (1), Br(2), F(3))

**Table1** Bond lengths of [Ni( $\alpha$ -tpdt)<sub>2</sub>]<sup>-</sup> in the crystal structure of **1**, **2** and **3**

|        | <b>1</b>  | <b>2</b>  | <b>3</b>   |
|--------|-----------|-----------|------------|
| Ni-S1  | 2.1634(8) | 2.1673(7) | 2.1731(15) |
| Ni-S2  | 2.1629(8) | 2.1732(7) | 2.1615(14) |
| Ni-S4  | 2.1645(8) | 2.1639(7) | 2.1583(14) |
| Ni-S5  | 2.1667(7) | 2.1641(7) | 2.1617(14) |
| S1-C2  | 1.735(3)  | 1.723(3)  | 1.726(5)   |
| S2-C1  | 1.717(3)  | 1.723(3)  | 1.740(5)   |
| S5-C5  | 1.726(3)  | 1.718(3)  | 1.723(5)   |
| S4-C6  | 1.726(3)  | 1.725(3)  | 1.726(3)   |
| S3-C1  | 1.733(3)  | 1.707(5)  | -          |
| S3-C2  | -         | -         | 1.730(5)   |
| S3-C4  | 1.704(4)  | 1.558(7)  | 1.706(6)   |
| S6-C5  | 1.732(3)  | 1.740(3)  | 1.759(5)   |
| S6-C8  | 1.695(3)  | 1.678(4)  | 1.667(6)   |
| S7-C6  | 1.673(19) | -         | 1.681(19)  |
| S7-C8  | 1.52(2)   | -         | 1.57(2)    |
| C1-C2  | 1.376(4)  | 1.377(4)  | 1.367(7)   |
| C1-C3  | -         | -         | 1.461(7)   |
| C2-C3  | 1.491(4)  | 1.466(18) | -          |
| C5-C6  | 1.373(4)  | 1.375(4)  | 1.363(7)   |
| C3-C4  | 1.375(4)  | 1.371(15) | 1.362(8)   |
| C6-C7  | 1.451(12) | 1.565(6)  | 1.49(2)    |
| C7-C8  | 1.390(13) | 1.221(7)  | 1.39(2)    |
| S30-C2 | -         | 1.705(7)  | -          |
| S30-C4 | -         | 1.475(8)  | -          |
| S70-C6 | -         | 1.528(8)  | -          |
| S70-C8 | -         | 1.370(19) | -          |
| C1-C30 | -         | 1.507(17) | -          |
| C4-C30 | -         | 1.409(17) | -          |
| C5-C70 | -         | 1.579(19) | 1.50(4)    |
| C8-C70 | -         | 1.468(8)  | 1.399(19)  |
| C5-C60 | 1.494(17) | -         | -          |
| C8-C60 | 1.355(17) | -         | -          |

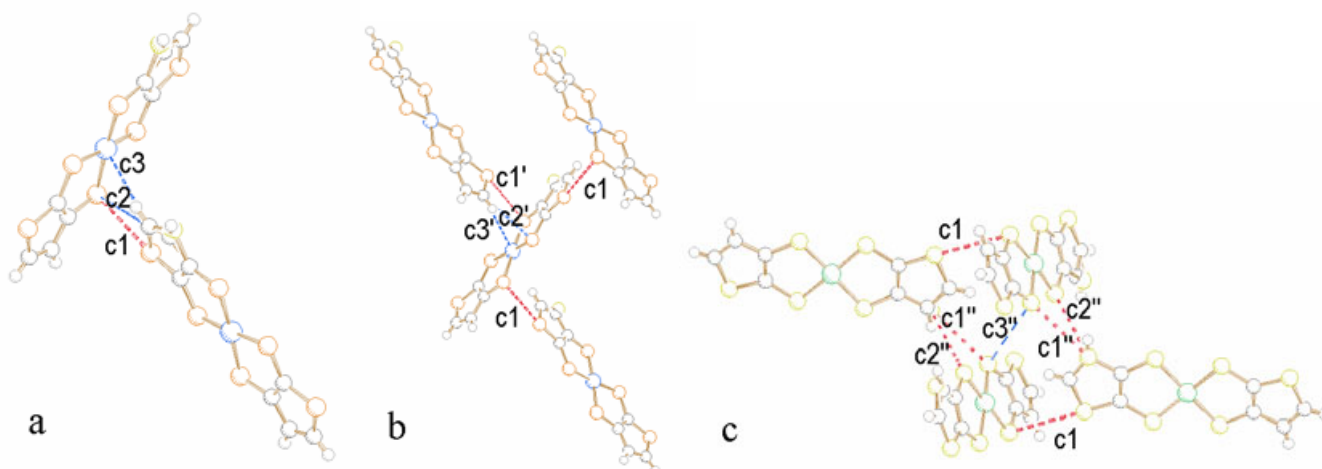

a) View of the interanionic intrachain contacts in compound **1**: c1 - sdP  $\cong$  -0.004 and  $Q_w = 0.95$  (83%; FM); c2 - sdP  $\cong$  0.0095 and  $Q_w = 1.09$  (100%; AFM); c3 - sdP  $\cong$  0.008 and  $Q_w = 1.05$  (100%; AFM);  
b) interchain contacts: c1' - sdP  $\cong$  -0.004 and  $Q_w = 1.01$  (100%; FM); c2' - sdP  $\cong$  0.0085 and  $Q_w = 1.10$  (100%; AFM); c3' - sdP  $\cong$  0.008 and  $Q_w = 1.08$  (100%; AFM); c) interlayer contacts: c1'' - sdP  $\cong$  -0.0035 and  $Q_w = 0.96$  (17%; FM); c2'' - sdP  $\cong$  -0.0035 and  $Q_w = 1.02$  (17%; FM); c3'' - sdP  $\cong$  0.008 and  $Q_w = 1.08$  (100%; AFM).
